# Supplementary material for: d-Tagatose attenuates DSS-induced ulcerative colitis by inhibiting inflammation, reducing intestinal barrier damage and modulating the intestinal flora composition
Source: Royal Society of Chemistry journal article supplement (doi:10.1039/d4fo06475e), 2025-01-01
Supplement: d4fo06475e1.pdf [file d4fo06475e1.pdf]

## Supplementary Materials

**Table S1.** Criteria for scoring disease activity index

| Score | Weight loss (%) | Stool consistency | Occult/gross bleeding |
|-------|-----------------|-------------------|-----------------------|
| 0     | <1              | Normal            | Normal                |
| 1     | 1-5             |                   |                       |
| 2     | 5-10            | Loose stool       | Hemoccult positive    |
| 3     | 10-15           |                   |                       |
| 4     | >15             | Diarrhoea         | Gross bleeding        |

**Table S2.** Criteria for scoring histology

| Score | Degree of inflammatory                       | Infiltration degree of tissue<br>Damage |
|-------|----------------------------------------------|-----------------------------------------|
| 0     | No inflammatory cells                        | No damage                               |
| 1     | Infiltration around the base of the<br>crypt | Goblet cell depletion                   |
| 2     | Infiltration into the mucosa                 | Extensive goblet cell depletion         |
| 3     | Extensive infiltration into the<br>mucosat   | Crypts depletion                        |
| 4     | Infiltration within the submucosa            | Extensive crypts depletion              |

**Table S3.** Primers of qPCR.

| Gene          | Forward Primer (5'-3')       | Reverse Primer (5'-3')        |
|---------------|------------------------------|-------------------------------|
| TNF- $\alpha$ | ACCCTCACACTCACAAACCA         | ATAGCAAATCGGCTGACGGT          |
| IL-1 $\beta$  | GCTTCAGGCAGGCAGTATCA         | AATGGGAACGTCACACACCA          |
| IL-6          | CCCCAATTTCCAATGCTCTCC        | CGCACTAGGTTTGCCGAGTA          |
| IL-10         | AATAAGCTCCAAGACCAAGG<br>TGT  | CATCATGTATGCTTCTATGCAG<br>TTG |
| iNOS          | CAACAGGAACCTACCAGCTC<br>ACT  | AGCCTGAAGTCATGTTTGCCG         |
| COX-2         | GAAATATCAGGTCATTGGTGG<br>AGA | ATGCTCCTGCTTGAGTATGTCTG       |
| GAPDH         | CCTCGTCCCGTAGACAAAATG        | TGAGGTCAATGAAGGGGTCGT         |

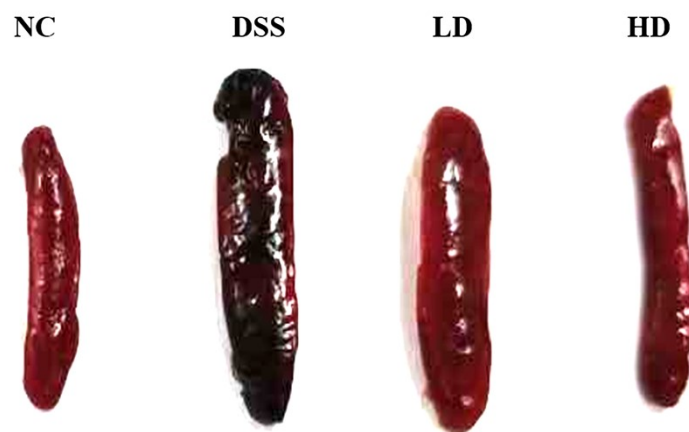

**Fig. S1** Representative original images of livers in the NC, DSS, LD and HD group.

(NC was the control group, DSS was the model group, LD was the low-dose 50 mg/mL D-tagatose group, and HD was the high-dose 100 mg/mL D-tagatose group)

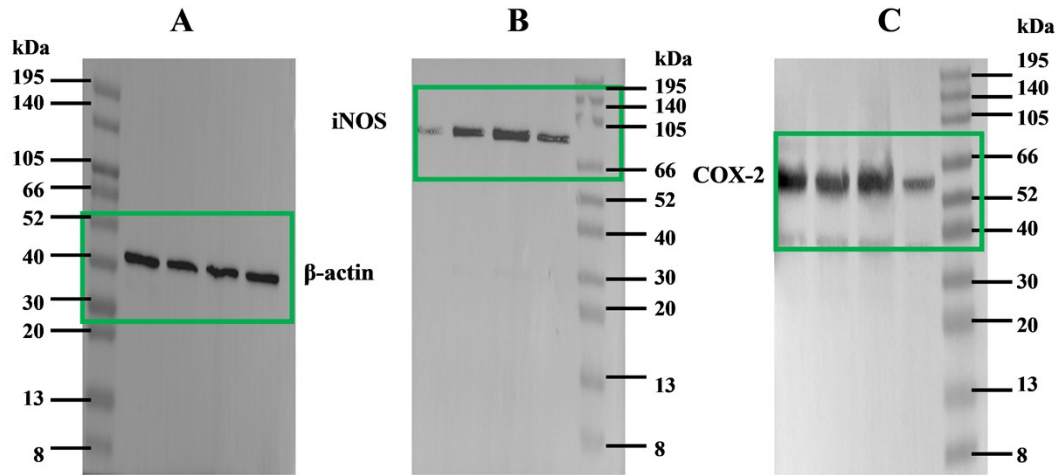

**Fig. S2** Representative western blot original images of iNOS and COX-2. (A) Representative western blot original images of  $\beta$ -actin in the NC, DSS, LD and HD group. (B) Representative western blot original images of iNOS in the NC, DSS, LD and HD group. (C) Representative western blot original images of COX-2 in the NC, DSS, LD and HD group. (NC was the control group, DSS was the model group, LD was the low-dose 50 mg/mL D-tagatose group, and HD was the high-dose 100 mg/mL D-tagatose group)

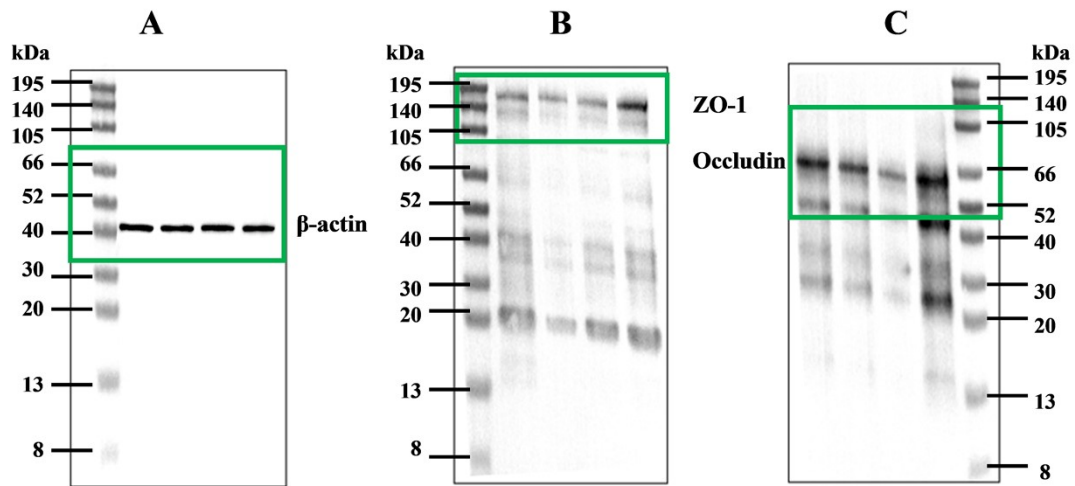

**Fig. S3** Representative western blot original images of ZO-1 and Occludin. (A) Representative western blot original images of  $\beta$ -actin in the NC, DSS, LD and HD group. (B) Representative western blot original images of ZO-1 in the NC, DSS, LD and HD group. (C) Representative western blot original images of Occludin in the NC, DSS, LD and HD group. (NC was the control group, DSS was the model group, LD was the low-dose 50 mg/mL D-tagatose group, and HD was the high-dose 100 mg/mL D-tagatose group)

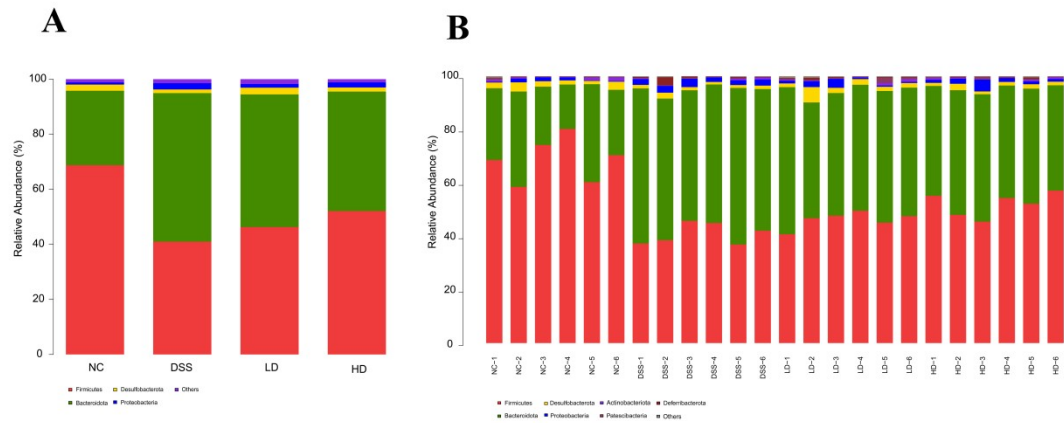

**Fig. S4** Effect of D-tagatose on microbiota regulation at the phylum level. (A) Abundance of the colonic intestinal flora composition at the phylum level in NC, DSS, LD and HD group. (B) Abundance of the colonic intestinal flora composition at the phylum level in each mice in the NC, DSS, LD and HD group. (NC was the control group, DSS was the model group, LD was the low-dose 50 mg/mL D-tagatose group, and HD was the high-dose 100 mg/mL D-tagatose group)

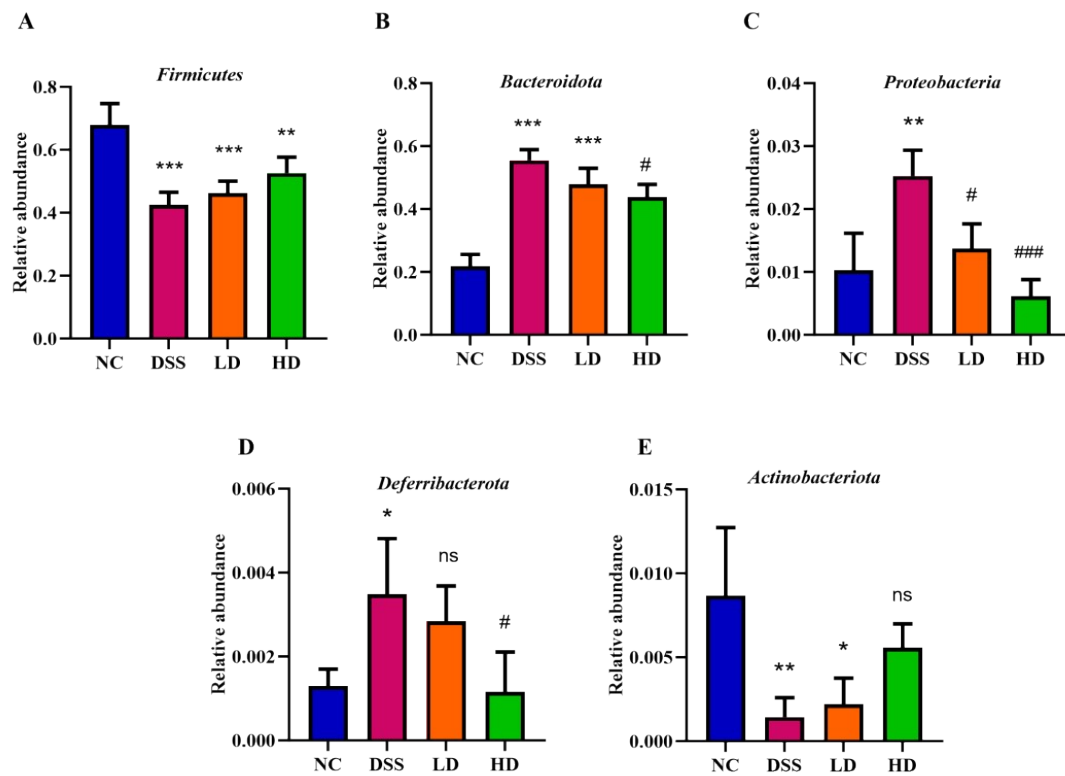

**Fig. S5** Relative abundance of D-tagatose for microbiota regulation at phylum levels. (A) Abundance at the level of *Firmicutes*, (B) *Bacteroidetes*, (C) *Proteobacteria*, (D) *Deferribacterota*, (E) *Actinobacteria* in the NC, DSS, LD, and HD groups. (NC was the control group, DSS was the model group, LD was the low-dose 50 mg/mL D-tagatose group, and HD was the high-dose 100 mg/mL D-tagatose group)



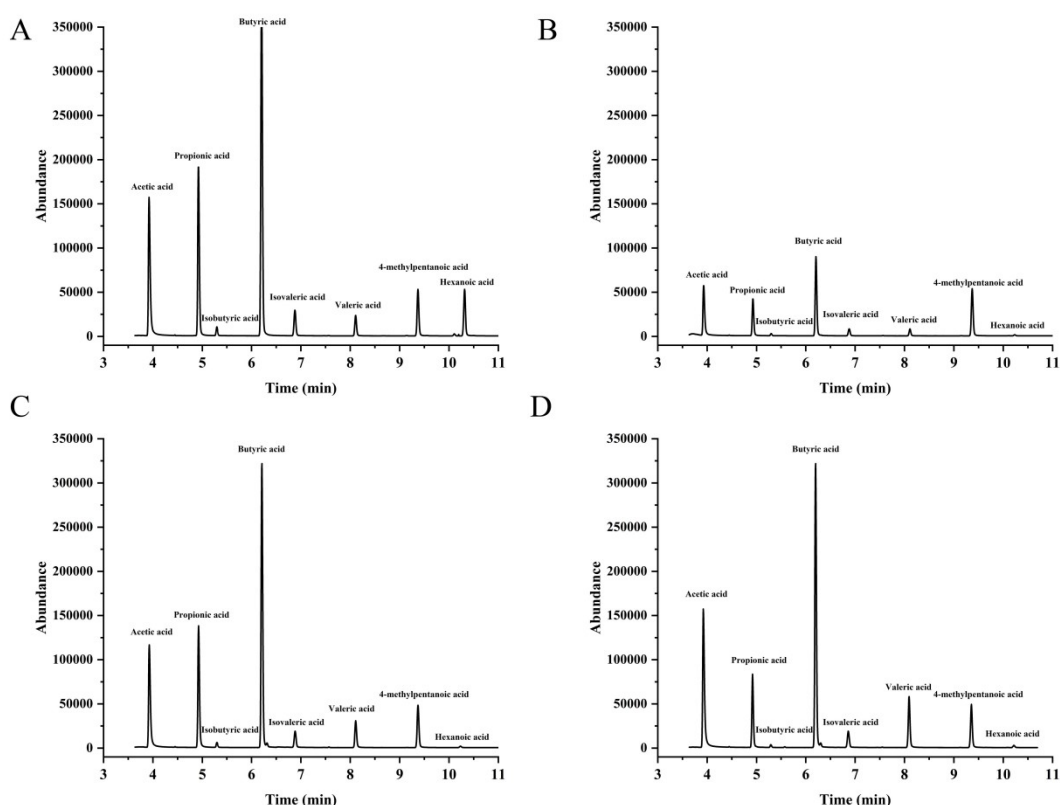

**Fig. S6** Acetic acid, propionic acid, butyric acid, isobutyric acid, valeric acid, isovaleric acid and hexanoic acid in the NC, DSS, LD, and HD groups were analyzed by GC/MSD. (A) Acetic acid, propionic acid, butyric acid, isobutyric acid, valeric acid, isovaleric acid and hexanoic acid in the NC groups were analyzed by GC/MSD, (B) acetic acid, propionic acid, butyric acid, isobutyric acid, valeric acid, isovaleric acid and hexanoic acid in the DSS groups were analyzed by GC/MSD, (C) acetic acid, propionic acid, butyric acid, isobutyric acid, valeric acid, isovaleric acid and hexanoic acid in the LD groups were analyzed by GC/MSD, and (D) acetic acid, propionic acid, butyric acid, isobutyric acid, valeric acid, isovaleric acid and hexanoic acid in the HD groups were analyzed by GC/MSD. (Detection conditions of GC/MSD mass spectrometer as follows. GC conditions: The oven temperature was programmed to an initial temperature of 90 °C; ramped to 160 °C at 10 °C/min; then ramped at 40

°C/min to 240 °C and hold for 5 min. The carrier gas was helium at a flow rate of 1.0 mL/min. MSD conditions: Inlet temperature was 250 °C; ion source temperature was 230 °C; transfer line line temperature 250 °C, quadrupole temperature 150 °C. With the electricity sub-bombardment ionization source, the electron energy was 70 eV. NC was the control group, DSS was the model group, LD was the low-dose 50 mg/mL D-tagatose group, and HD was the high-dose 100 mg/mL D-tagatose group)
